## Retraction: MicroRNA-595 sensitizes ovarian cancer cells to cisplatin by targeting ABCB1

Songyu Tian<sup>1</sup>, Mingyue Zhang<sup>2</sup>, Xiuwei Chen<sup>1</sup>, Yunduo Liu<sup>1</sup> and Ge Lou<sup>1</sup>

<sup>1</sup>Department of Gynecology Oncology, Cancer Hospital of Harbin Medical University, Harin, 150081, Heilongjiang, China

<sup>2</sup>Department of Anaesthesiology, Cancer Hospital of Harbin Medical University, Harin, 150081, Heilongjiang, China

**Published:** April 24, 2026

**Copyright:** © 2026 Tian et al. This is an open access article distributed under the terms of the [Creative Commons Attribution License](#) (CC BY 4.0), which permits unrestricted use, distribution, and reproduction in any medium, provided the original author and source are credited.

**This article has been retracted:** Oncotarget's Image Forensics investigation of this paper has revealed multiple instances of image duplication and overlap with unrelated papers. Specifically:

Figure 3: The Transwell assay image in Figure 3I was previously published in Figure 5D of unrelated paper [1] and Figure 3C of [2]. Additionally, the image from Figure 3J was found in Figure 3C of [2].

Figure 6: The Transwell assay image in Figure 6M was found in Figure 3A of the earlier published unrelated paper [2]. Western Blot images from Figure 6B were found in Figure 4G and Figure 6C of the concurrently published articles [3, 4], respectively, and in Figures 3A and 6E of the 2017 article [5], which has already been retracted.

The authors did not respond to requests to comment on these concerns or provide the original data. Consequently, the Editorial decision has been made to retract this paper. Oncotarget has reached out to all authors to confirm this retraction, but received no response.

Original article: Oncotarget. 2016; 7:87091–87099. <https://doi.org/10.18632/oncotarget.13526>

## REFERENCES

1. Xue Z, Zhao J, Niu L, An G, Guo Y, Ni L. Up-Regulation of MiR-300 Promotes Proliferation and Invasion of Osteosarcoma by Targeting BRD7. PLoS One. 2015; 10:e0127682. <https://doi.org/10.1371/journal.pone.0127682>. [PubMed]. Retraction in: PLoS One. 2022; 17:e0269904. <https://doi.org/10.1371/journal.pone.0269904>. [PubMed]
2. Li Z, Yu X, Wang Y, Shen J, Wu WK, Liang J, Feng F. By downregulating TIAM1 expression, microRNA-329 suppresses gastric cancer invasion and growth. Oncotarget. 2015; 6:17559–69. <https://doi.org/10.18632/oncotarget.2755>. [PubMed]. Retraction in: Oncotarget. 2026; 17: 182–83. <https://doi.org/10.18632/oncotarget.28830>. [PubMed]
3. Yu L, Gong X, Sun L, Zhou Q, Lu B, Zhu L. The Circular RNA Cdr1as Act as an Oncogene in Hepatocellular Carcinoma through Targeting miR-7 Expression. PLoS One. 2016; 11:e0158347. <https://doi.org/10.1371/journal.pone.0158347>. [PubMed]. Retraction in: PLoS One. 2023; 18:e0283112. <https://doi.org/10.1371/journal.pone.0283112>. [PubMed]
4. Sun L, Liang J, Wang Q, Li Z, Du Y, Xu X. MicroRNA-137 suppresses tongue squamous carcinoma cell proliferation, migration and invasion. Cell Prolif. 2016; 49:628–35. <https://doi.org/10.1111/cpr.12287>. [PubMed]
5. Jin C, Feng Y, Ni Y, Shan Z. MicroRNA-610 suppresses osteosarcoma oncogenicity via targeting TWIST1 expression. Oncotarget. 2017; 8:56174–84. <https://doi.org/10.18632/oncotarget.17045>. [PubMed]. Retraction in: Oncotarget. 2025; 16:719–20. <https://doi.org/10.18632/oncotarget.28771>. [PubMed]
